# Supplementary material for: Pyramiding and evaluation of both a foreign Bacillus thuringiensis and a Lysine-rich protein gene in the elite indica rice 9311
Source: PubMed Central journal article supplement — Breed Sci. 2016 Jul 27;66(4):591–8. doi: 10.1270/jsbbs.16014 (PMC5010305; doi:10.1270/jsbbs.16014), 2016-07-27
Supplement: 66_16014_1.pdf [file 66_16014_1.pdf]

Supplemental Table 1. Primer pairs used for the identification of the pyramided genes through MAS and qRT-PCR analysis of the *LRP* gene

| Primer   | Target gene            | Sequence (5'-3')      | Length of product (bp) |
|----------|------------------------|-----------------------|------------------------|
| LRP-F    | <i>LRP</i>             | ATGGGTGTTTTACATATG    | 477                    |
| LRP-R    |                        | TTCAATTGTATTCAGGATGG  |                        |
| Cry1Ac-F | <i>cry1Ac</i>          | TCGAGACGTTAGCGTGTTG   | 494                    |
| Cry1Ac-R |                        | GAGGAAAGGTAAACTCGGGC  |                        |
| actin-F  | <i>ACTIN</i> (qRT-PCR) | TGGCATCTCTCAGCACATTCC | 76                     |
| actin-R  |                        | TGCACAATGGATGGGCCAGA  |                        |
| lrp-F    | <i>LRP</i> (qRT-PCR)   | TGCTGCTTTGCCAGACACA   | 67                     |
| lrp-R    |                        | TCCAGAAGGTCCAGCACTCAA |                        |
